# Supplementary material for: Temperature-induced reversible structural phase transition of 1,4-dimethyl-1,4-diazabicyclo[2.2.2]octane bis(perchlorate)
Source: Royal Society of Chemistry journal article supplement (doi:10.1039/c5ra07526b), 2015-01-01
Supplement: c5ra07526b1.pdf [file c5ra07526b1.pdf]

## Supporting Information for Dielectric and structural phase transition of 1,4-dimethyl-1,4- diazabicyclo[2.2.2]octane bis(perchlorate)

Li-Zhuang Chen,\* Xing-Xing Cao, Deng-Deng Huang and Qi-Jian Pan

*School of Environmental and Chemical Engineering, Jiangsu University of Science and Technology,  
Zhenjiang 212003, P. R. China*

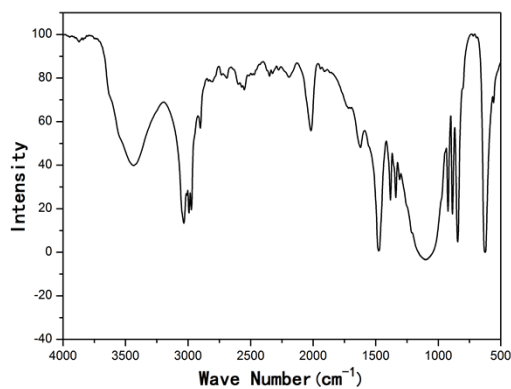

Figure S1 IR of 1

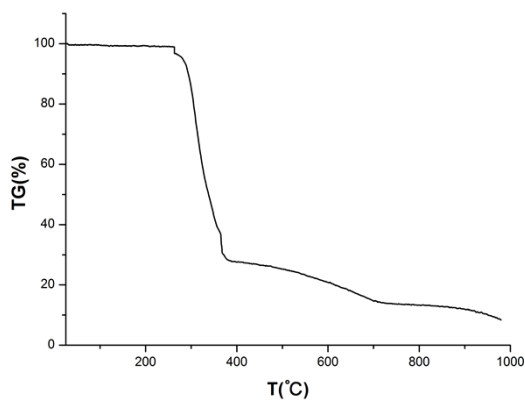

Figure S2 TG curve of 1

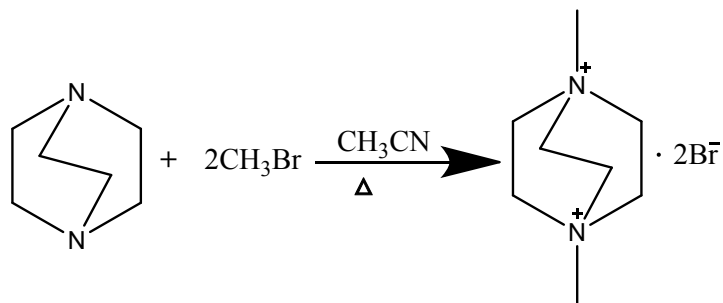

**Scheme S1.** Synthesis of 1,4-dimethyl-1,4-diazabicyclo [2.2.2] octane -1,4 - diium dibromide

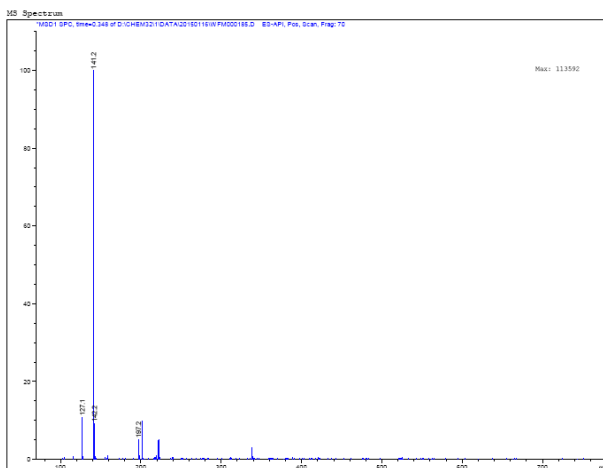

**Figure S3.** MS analysis of 1,4-dimethyl-1,4-diazabicyclo [2.2.2] octane -1,4 - diium dibromide

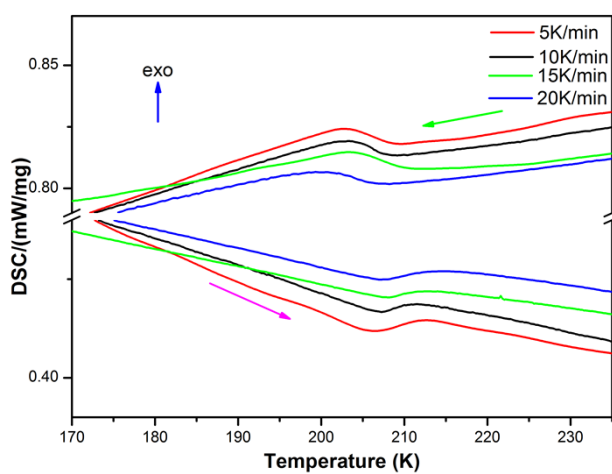

**Figure S4.** DSC curves of **1** obtained in a heating-cooling mode at 5 K/min, 10 K/min, 15 K/min and 20 K/min respectively.

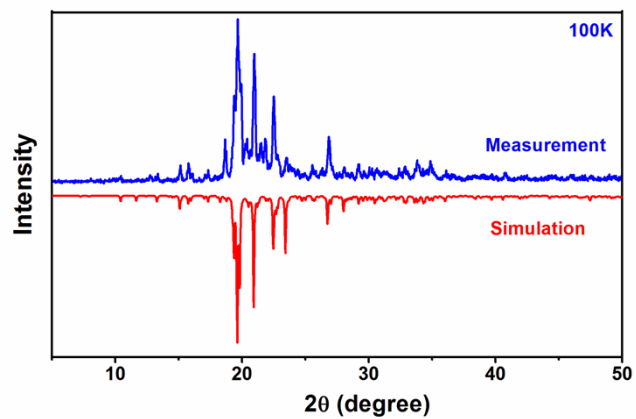

Figure S5. The XRPD of **1** at 100K in the range of 3-50°.

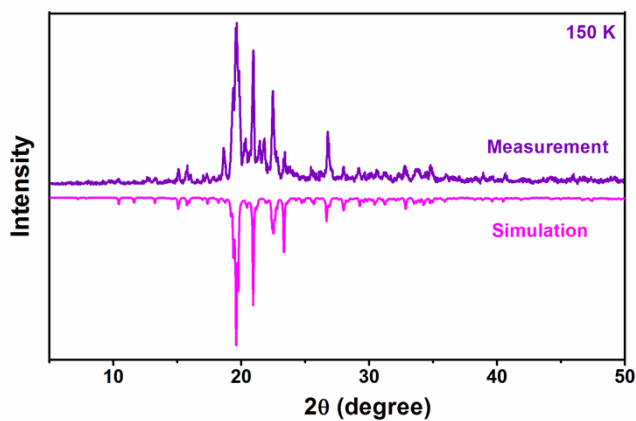

Figure S6. The XRPD of **1** at 150K in the range of 3-50°.

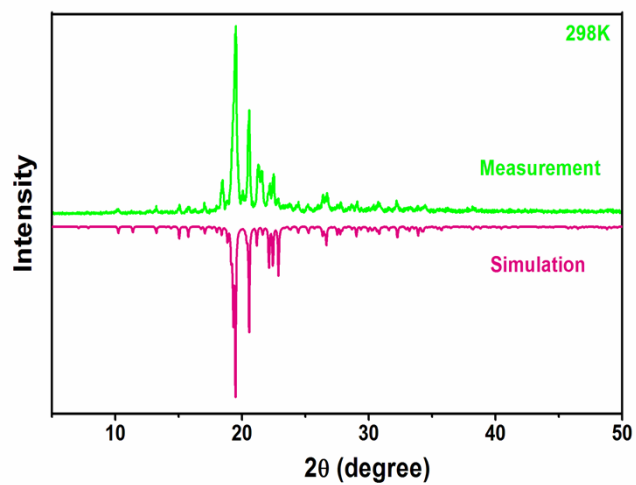

Figure S7. The XRPD of **1** at 298K in the range of 3-50°.
